# Supplementary material for: Capture, Culture and Release of Postlarvae Fishes: Proof-of-Concept as a Tool Approach to Support Reef Management
Source: Frontiers journal article supplement (doi:10.3389/fmars.2021.718526), 2021-09-20
Supplement: Table_1.doc [file Table_1.doc]

**Supplementary Table S1**

(PERMANOVA) for the species composition in the period July-October 2018. The data were transformed with ln (x + l) to ensure homogeneity. The result is indicated as: *** P <0.001.

| F.V. | Df | SS | MSS | F | *P-value* |  |
| --- | --- | --- | --- | --- | --- | --- |
| Month | 4 | 2.9773 | 0.99244 | 11.0426 | **0.000999** | ******* |
| Residual | 20 | 1.7975 | 0.08987 |  |  |  |
